# Supplementary material for: Antidepressant use and cognitive decline in community-dwelling elderly people – The Three-City Cohort
Source: Springer Nature journal article supplement (doi:10.1186/s12916-017-0847-z), 2017-04-19
Supplement: MOESM1 [file 12234072]

Table S1. Multi-adjusted associations of antidepressant use with 10-year cognitive changes in participants without past major depressive episode

|                            | MMSE               |         | BVRT               |         | Isaac's test   |         | TMTA           |         | TMTB           |         |
|----------------------------|--------------------|---------|--------------------|---------|----------------|---------|----------------|---------|----------------|---------|
|                            | $\sqrt{30 - MMSE}$ |         | $\sqrt{15 - BVRT}$ |         |                |         | $\ln(TMTA)$    |         | $\ln(TMTB)$    |         |
|                            | N=6036             |         | N=5964             |         | N=5981         |         | N=5099         |         | N=4928         |         |
|                            | $\beta$ (SE)       | p-value | $\beta$ (SE)       | p-value | $\beta$ (SE)   | p-value | $\beta$ (SE)   | p-value | $\beta$ (SE)   | p-value |
| <b>Antidepressant</b>      |                    | 0.95    |                    | 0.30    |                | 0.0007  |                | 0.001   |                | 0.10    |
| <b>TCAs</b>                | 0.006 (0.090)      | 0.95    | 0.104 (0.077)      | 0.18    | -4.545 (1.370) | 0.0009  | 0.191 (0.063)  | 0.002   | 0.050 (0.075)  | 0.51    |
| <b>SSRIs</b>               | -0.005 (0.058)     | 0.93    | 0.061 (0.050)      | 0.22    | -1.971 (0.899) | 0.03    | 0.102 (0.040)  | 0.01    | 0.115 (0.048)  | 0.02    |
| <b>Others</b>              | -0.065 (0.111)     | 0.56    | -0.054 (0.095)     | 0.57    | -2.472 (1.735) | 0.15    | 0.055 (0.078)  | 0.48    | -0.016 (0.093) | 0.87    |
| <b>Antidepressant*time</b> |                    | 0.66    |                    | 0.72    |                | 0.41    |                | 0.56    |                | 0.26    |
| <b>TCAs*time</b>           | 0.019 (0.022)      | 0.40    | 0.007 (0.020)      | 0.71    | 0.395 (0.236)  | 0.09    | -0.016 (0.011) | 0.18    | -0.006 (0.015) | 0.67    |
| <b>SSRIs*time</b>          | 0.012 (0.013)      | 0.35    | 0.012 (0.012)      | 0.29    | -0.012 (0.140) | 0.93    | 0.001 (0.006)  | 0.92    | -0.015 (0.008) | 0.06    |
| <b>Others*time</b>         | 0.002 (0.025)      | 0.94    | 0.006 (0.022)      | 0.78    | -0.063 (0.275) | 0.82    | 0.005 (0.013)  | 0.69    | -0.008 (0.016) | 0.61    |

Models adjusted for time, age, gender, center, education, body mass index, alcohol, caffeine, fruit and vegetable consumption, activity limitations, visual deficiency, respiratory disease, diabetes, ischemic pathology, ApoE4 genotype, benzodiazepines, anticholinergic drugs, other psychotropic drugs, number of other drugs, depressive symptoms, anxiety symptoms as well as time by age, time by center, time by education and time by ApoE4 interactions.

BVRT: Benton's Visual Retention Test, MMSE: Mini Mental State Examination, SE: standard error, SSRI: selective serotonin reuptake inhibitors, TCA: tricyclic antidepressant, TMTA and TMTB: Trail Making Tests A and B

Table S2. Multi-adjusted associations of antidepressant use with 10-year cognitive changes in participants without incident dementia

|                            | MMSE               |         | BVRT               |         | Isaac's test   |         | TMTA            |         | TMTB           |         |
|----------------------------|--------------------|---------|--------------------|---------|----------------|---------|-----------------|---------|----------------|---------|
|                            | $\sqrt{30 - MMSE}$ |         | $\sqrt{15 - BVRT}$ |         |                |         | $\ln(TMTA)$     |         | $\ln(TMTB)$    |         |
|                            | N=6681             |         | N=6594             |         | N=6622         |         | N=5577          |         | N=5408         |         |
|                            | $\beta$ (SE)       | p-value | $\beta$ (SE)       | p-value | $\beta$ (SE)   | p-value | $\beta$ (SE)    | p-value | $\beta$ (SE)   | p-value |
| <b>Antidepressant</b>      |                    | 0.59    |                    | 0.23    |                | 0.0007  |                 | 0.08    |                | 0.66    |
| <b>TCAs</b>                | -0.019 (0.071)     | 0.79    | 0.114 (0.061)      | 0.06    | -4.272 (1.073) | <0.0001 | 0.085(0.048)    | 0.08    | 0.006 (0.056)  | 0.91    |
| <b>SSRIs</b>               | -0.057 (0.052)     | 0.27    | 0.035 (0.044)      | 0.44    | -0.776 (0.793) | 0.33    | 0.056 (0.036)   | 0.12    | 0.051 (0.043)  | 0.23    |
| <b>Others</b>              | -0.078 (0.092)     | 0.40    | 0.040 (0.078)      | 0.61    | -0.975 (1.413) | 0.49    | 0.077 (0.063)   | 0.22    | -0.025 (0.075) | 0.74    |
| <b>Antidepressant*time</b> |                    | 0.78    |                    | 0.63    |                | 0.02    |                 | 0.60    |                | 0.76    |
| <b>TCAs*time</b>           | 0.011 (0.015)      | 0.48    | 0.007 (0.014)      | 0.59    | 0.420 (0.162)  | 0.01    | -0.010 (0.008)  | 0.20    | -0.005 (0.010) | 0.63    |
| <b>SSRIs*time</b>          | 0.008(0.011)       | 0.46    | 0.012 (0.010)      | 0.24    | 0.209 (0.121)  | 0.09    | -0.003 (0.005)  | 0.64    | 0.003 (0.007)  | 0.64    |
| <b>Others*time</b>         | 0.005 (0.020)      | 0.82    | 0.006 (0.019)      | 0.76    | -0.111 (0.221) | 0.62    | -0.0003 (0.010) | 0.98    | -0.012(0.014)  | 0.40    |

Models adjusted for time, age, gender, center, education, body mass index, alcohol, caffeine, fruit and vegetable consumption, activity limitations, visual deficiency, respiratory disease, diabetes, ischemic pathology, ApoE4 genotype, benzodiazepines, anticholinergic drugs, other psychotropic drugs, number of other drugs, depressive symptoms, anxiety symptoms as well as time by age, time by center, time by education and time by ApoE4 interactions.

BVRT: Benton's Visual Retention Test, MMSE: Mini Mental State Examination, SE: standard error, SSRI: selective serotonin reuptake inhibitors, TCA: tricyclic antidepressant, TMTA and TMTB: Trail Making Tests A and B

Table S3. Multi-adjusted associations of antidepressant use with 10-year cognitive changes without censoring of cognition after treatment change

|                            | MMSE               |         | BVRT               |         | Isaac's test |         | TMTA           |         | TMTB           |         |
|----------------------------|--------------------|---------|--------------------|---------|--------------|---------|----------------|---------|----------------|---------|
|                            | $\sqrt{30 - MMSE}$ |         | $\sqrt{15 - BVRT}$ |         |              |         | $\ln(TMTA)$    |         | $\ln(TMTB)$    |         |
|                            | N=7365             |         | N=7263             |         | N=7293       |         | N=6380         |         | N=6128         |         |
|                            | $\beta$ (SE)       | p-value | $\beta$ (SE)       | p-value | $\beta$ (SE) | p-value | $\beta$ (SE)   | p-value | $\beta$ (SE)   | p-value |
| <b>Antidepressant</b>      |                    | 0.34    |                    | 0.01    |              | 0.0002  |                | 0.02    |                | 0.54    |
| <b>TCAs</b>                | 0.035 (0.063)      | 0.58    | 0.156 (0.053)      | 0.003   | -3.98 (0.96) | <0.0001 | 0.080 (0.037)  | 0.03    | 0.022(0.043)   | 0.61    |
| <b>SSRIs</b>               | -0.027 (0.047)     | 0.57    | 0.062 (0.040)      | 0.12    | -1.33 (0.73) | 0.07    | 0.067 (0.029)  | 0.03    | 0.047 (0.034)  | 0.17    |
| <b>Others</b>              | -0.139 (0.084)     | 0.10    | 0.033 (0.071)      | 0.65    | -0.77 (1.32) | 0.56    | 0.016 (0.051)  | 0.75    | -0.008 (0.060) | 0.90    |
| <b>Antidepressant*time</b> |                    | 0.19    |                    | 0.31    |              | 0.51    |                | 0.58    |                | 0.75    |
| <b>TCAs*time</b>           | 0.009 (0.011)      | 0.39    | 0.0003 (0.010)     | 0.98    | 0.12 (0.12)  | 0.31    | -0.005 (0.005) | 0.35    | 0.003 (0.007)  | 0.61    |
| <b>SSRIs*time</b>          | 0.014 (0.008)      | 0.10    | 0.014 (0.007)      | 0.06    | -0.09 (0.09) | 0.32    | 0.002 (0.004)  | 0.65    | 0.001 (0.005)  | 0.86    |
| <b>Others*time</b>         | 0.018 (0.015)      | 0.23    | 0.003 (0.013)      | 0.78    | -0.09 (0.17) | 0.60    | 0.007 (0.007)  | 0.35    | -0.008 (0.009) | 0.35    |
